1 **Physiotherapist confidence level in mobilising stroke patients after decompressive**

2 **hemicraniectomy: are helmets useful?**

3 **Sanjay Budhdeo MRCP<sup>1,2</sup>, Toby Meek BSc<sup>3</sup>, Theodore D Cosco PhD<sup>1,4</sup>, Sanchit**

4 **Turaga BSc MBBS<sup>5</sup>, Aswin Chari MRCS<sup>6</sup>, Nikhil Sharma PhD FRCP<sup>1,2</sup>**

5 1 Department of Neuromuscular Diseases, UCL Queen Square Institute of Neurology, The  
6 National Hospital of Neurology, Queen Square, London

7

8 2 National Hospital for Neurology and Neurosurgery, Queen Square, London, UK, WC1N

9 3GB

10 3 Addenbrooke's Hospital, Hills Road, Cambridge, UK, CB2 0QQ

11 4 Oxford Institute of Population Ageing, University of Oxford, Oxford, UK OX2 6PR

12 5 John Radcliffe Hospital, Headley Way, Headington, Oxford, OX3 9DU

13 6 Royal London Hospital, Whitechapel Road, London, UK, E1 1BB

14 Correspondence to be addressed to:

15 Dr Sanjay Budhdeo, Department of Neuromuscular Diseases, UCL Queen Square Institute of

16 Neurology, The National Hospital of Neurology, Queen Square, London

17 Email: [sanjay.budhdeo@doctors.org.uk](mailto:sanjay.budhdeo@doctors.org.uk)

18

19 **Authorship**

20 SB planned the project. TM completed data collection. TDC completed data analysis. The

21 first draft was written by SB. This was revised by TM, TDC, ST, AC and NS.

22

23 Word count: 2942

24 Number of tables and figures: 1

25 Running Title: Stroke patients and decompressive hemicraniectomy: are helmets useful?

26 Grant support: Dr Sharma was supported by the National Institute for Health Research

27 University College London Hospitals Biomedical Research Centre.

28

29

30

31

32

33

34

35

36

37

38

39

40

41

42

43 **Abstract**

44 **Introduction:** Decompressive hemicraniectomy is a lifesaving measure in malignant middle  
45 cerebral artery infarction; however, this leaves patients with a skull defect. There is  
46 variability of helmet use in this patient group across Britain. We aimed to examine whether  
47 (1) specialist physiotherapist were more confident mobilising a patient with hemiparesis and  
48 skull defect than a non-specialist physiotherapist (2) non-specialist and specialist  
49 physiotherapists would be more comfortable mobilising this patient with a helmet as opposed  
50 to without a helmet.

51 **Methods:** We carried out a cross-sectional online survey of specialist physiotherapists and  
52 non-specialist physiotherapists in Britain. Recruitment was through mailing lists.  
53 Physiotherapists were asked to rank their confidence level on a 5-point Likert scale of  
54 mobilising an example patient with and without a helmet. They were also asked about the  
55 number of additional therapists needed to safely mobilise the patient.

56 **Findings:** 96 physiotherapists completed the survey; 44 were specialists and 52 were non-  
57 specialists. Specialist physiotherapists felt more comfortable mobilising patients (mean  
58 difference = 0.68,  $p < 0.001$ ). Non-specialist physiotherapists felt significantly more  
59 comfortable mobilising patients with a helmet (mean difference = 0.96,  $p$  value  $< 0.001$ ), as  
60 did specialist physiotherapists (mean difference = 0.68,  $p$  value  $< 0.001$ ). There was no  
61 difference in confidence level arising from helmet use between the two groups ( $p = 0.72$ ).

62 **Conclusions:** Use of helmets may allow specialist and non-specialist physiotherapists to feel  
63 more comfortable when mobilising stroke patients post-decompressive hemicraniectomy.  
64 Consideration should be made by hospitals and health systems for the provision of helmets  
65 this patient group, to maximise functional gains.

66

67

68

69 **Introduction**

70 **Hemicraniectomy reduces mortality in stroke**

71 Large space occupying (or malignant) middle cerebral artery (MCA) infarction or  
72 hemispheric infarction represents approximately 1-10% of all strokes and has a grave  
73 prognosis (1). Without treatment, up to three quarters of these patients will die due to brain  
74 herniation (1). Early decompressive hemicraniectomy has been shown to reduce mortality,  
75 with the number needed to treat (NNT) for survival being 2.4, albeit with substantial  
76 morbidity (2). The hemicraniectomy performed for malignant MCA infarction is large,  
77 leaving a clearly visible skull defect. It is unknown whether the presence of this skull defect  
78 may influence the delivery of rehabilitation in the months following stroke, prior to  
79 cranioplasty; importantly, this period after stroke and surgery is critical for rehabilitation.  
80 Given the benefits of this procedure to patients, understanding the potential barriers to  
81 effective rehabilitation is important to providing optimal patient care. (2) (3) (4) (5) (6).

82 **Gait problems in malignant MCA infarcts**

83 Gait problems in MCA strokes arise from hemiparesis which typically results in severe  
84 restrictions of mobility, as demonstrated DESTINY, DECIMAL and HAMLET trials (7).  
85 These gait issues could plausibly contribute to a higher risk of head injuries in postsurgical  
86 phase for patients with decompressive hemicraniectomy, especially without appropriate  
87 physiotherapy and head protection.

88 **Direct complications of the skull defect remain unexamined**

89 There is a paucity of evidence in the literature regarding adverse direct complications from  
90 the skull defect following decompressive hemicraniectomy (7). One case report describes a  
91 patient who died due to haematoma formation at the site of skull defect following a fall (8).  
92 Helmets are an option for cranial protection prior to cranioplasty. The authors' experience is

93 that there is a variation of practice of helmet use in decompressive hemicraniectomy in UK  
94 neurosciences centres. This was confirmed by an informal survey of 10 neurosciences  
95 centres, suggesting that 50% used helmets. Studies analysing the physics of blunt trauma  
96 impact using helmets have provided evidence of the potential protective effect of a helmet (9)  
97 (10). No trials have been conducted into the use of helmets in patients post-decompressive  
98 hemicraniectomy, and whether they might provide protection for users. Given the rarity of  
99 direct complications of skull deficit (8), carrying out such a trial may require large numbers.

100

### 101 **Physiotherapist attitudes to the skull defect may influence rehabilitation**

102 In light of the paucity of evidence to assess utility of helmets and the difficulties obtaining  
103 such data, an alternative way of assessing the utility of helmets and justifying a future trial  
104 would be to look at beliefs regarding helmets of healthcare practitioners involved in  
105 rehabilitation, and assessing whether the use of helmets would change the extent of therapy  
106 that patients receive.

107 After decompressive hemicraniectomy, patients are managed with a multidisciplinary  
108 approach. The physiotherapists involved are typically defined by work in a specific practice  
109 setting such as in hospital (neurosurgical, neurological, stroke, or rehabilitation wards) or in  
110 the community. Initially patients receive physiotherapy on the ward immediately post-surgery  
111 however, they would continue to receive therapy on discharge in the community. Community  
112 based care has less access to specialists and therefore physiotherapists may feel less confident  
113 in dealing with large skull defects post hemicraniectomy due to injury potential. The World  
114 Federation of Neurorehabilitation (WFNR) and European Association for Neurorehabilitation  
115 (EANR) both recommend specialised education for immediate postoperative care on the ward  
116 and long-term neuro-rehabilitation in the community.

117 (11)

118 In order to assess confidence level levels for physiotherapists, we produced an online survey,  
119 which we sent to physiotherapists throughout England. Here, we define confidence level as  
120 the extent to which physiotherapists feel they can safely mobilise patients in an inpatient  
121 environment, for the purpose of undertaking activities related to rehabilitation. We used two  
122 proxies for physiotherapist confidence level. The first was a five-point Likert scale that  
123 assessed physiotherapist levels of confidence level when mobilising an example patient. The  
124 second was an estimation of the number of additional members of the therapist team that the  
125 physiotherapist thought would be needed to mobilise the example patient. We asked  
126 physiotherapists to consider these scenarios with and without a helmet.

127

128 Our primary aim was to study the possible impact of helmets on rehabilitation after  
129 hemicraniectomy for malignant MCA infarct. Our secondary aim was to understand whether  
130 any impact applied to all physiotherapist groups, and whether non-specialist physiotherapists  
131 were more affected. We tested three hypotheses. First, we hypothesised that there would be a  
132 difference between confidence levels between specialist and non-specialist physiotherapists.  
133 This would be expressed by absolute differences in self-described confidence level and  
134 opinions of number of therapists required to mobilise the patient without a helmet. Second,  
135 we hypothesised that use of a helmet will increase the confidence level of physiotherapists in  
136 mobilising the patient. This would be expressed as differences in the change in self-described  
137 confidence level between the two conditions, and opinions of number of therapists required to  
138 mobilise the patient between the same patient wearing and helmet and not wearing a helmet.  
139 Finally, our third hypothesis was that non-specialist physiotherapists would be more likely to  
140 have increased levels of confidence level from helmet use than specialist neuroscience  
141 physiotherapists. Currently, practice in the UK does involve the use of helmets in this patient

142 cohort. This study is important because it may provide evidence for the use of helmets in  
143 decompressive hemicraniectomy patients.

144

## 145 **Methods**

146

### 147 **Ethical Approval**

148 As per work employing similar methodologies (12) and in accordance with UCL Research  
149 Ethics Committee guidelines, this work is focused on service development and fulfils criteria  
150 for exemption.

### 151 **Study design**

152 The study was a cross sectional survey of physiotherapists who were members of specialist  
153 societies in the UK e.g. ACPIN (Association of Chartered Physiotherapists Associated in  
154 Neurology) and Chartered society of Physiotherapy. Links were disseminated through  
155 mailing lists and participants chose to be part of the survey. The Chartered Society of  
156 Physiotherapists has 58,000 chartered physiotherapists, physiotherapy students and support  
157 workers.

158

### 159 **Data Collection**

160 SurveyMonkey (<https://www.surveymonkey.com>) was used to build a survey for  
161 physiotherapists to collect information in order to test hypotheses. The survey consisted of an  
162 explanation of decompressive hemicraniectomy through description of the procedure, an  
163 axial CT imaging slice showing a patient pre- and post-decompressive hemicraniectomy and  
164 YouTube video demonstrating a three-dimensional view of the skull defect after  
165 decompressive hemicraniectomy (<https://www.youtube.com/watch?v=DQPSfXxOYYo>).

166



167 An introductory descriptor was used to explain the context of the survey, the purpose of  
168 hemicraniectomies: this can be found in the appendix.  
169  
170 Survey participants were then shown a YouTube video of a patient with stroke who has a  
171 hemiparetic gait, walking with assistance  
172 (<https://www.youtube.com/watch?v=ag5Qq46VOGU>). The YouTube videos were used under  
173 the Creative Commons license. They were asked to make reference to this video when  
174 answering the questionnaire. The patient's head was not viewed in the video, which aided  
175 anonymisation and meant that the video was not biased to the helmet or non-helmet  
176 condition. The owner of the patient video and CT scan were contacted and permission for use  
177 was granted.

178  
179 Survey participants were asked to rate their confidence level mobilising the patient on a five-  
180 point scale with and without helmet. Survey participants were also asked how many  
181 additional therapists they would require to feel comfortable mobilising the patient with and  
182 without a helmet. In addition, information regarding years of experience and practice setting  
183 of survey participants was collected.

184  
185 In order to recruit survey participants, the Association of Chartered Physiotherapists  
186 Interested in Neurology and Chartered Society of Physiotherapists were contacted. In  
187 addition, individual hospitals in the East of England and Greater London areas were  
188 contacted by email. The survey opened in January 2016 and results were collected in May  
189 2016.

190

191 **Characteristics of Physiotherapists**

192 In this study, specialist neurological physiotherapists were defined as those who currently  
193 work solely in a neurology, neurosurgery, stroke or neurorehabilitation hospital setting. Non-  
194 specialist physiotherapists may include physiotherapists with other specialties in teaching  
195 hospitals, physiotherapists with a more general case mix in district general hospitals, or  
196 physiotherapists with a general practice in the community or rehabilitation setting.

197 Participants were also asked to declare their years of practice as falling within 0-2 years, 2-5  
198 years, 5-10 years, or more than 10 years of practice.

199

200 For self-described confidence level in mobilizing the patient in the video contained within the  
201 survey, the Likert scale values were described as follows: very comfortable: 5, somewhat  
202 comfortable: 4, neither comfortable nor uncomfortable: 3, somewhat uncomfortable: 2, very  
203 uncomfortable: 1. For the number of additional therapists participants would require to feel  
204 comfortable mobilising the featured patient, survey options were: none, one, two, or at least  
205 three.

206

## 207 **Data Analysis**

208 Data was analysed using Stata version 14 (Stata Corp., College Station, TX). The first  
209 hypothesis examined the differences in self-described confidence level and in the number of  
210 additional therapists required between specialist and non-specialist physiotherapists. A  
211 logistic regression was undertaken ( $p < 0.05$  was considered significant). The independent  
212 variable was physiotherapist professional status (neurological specialist or non-specialist) and  
213 the dependent variable was physiotherapist confidence level (measured using self-described  
214 confidence level and number of additional therapists needed for mobilisation). Years of  
215 experience of the physiotherapists were controlled for.

216

217 The second hypothesis examined whether use of a helmet would result in differences in  
218 confidence level for physiotherapists. Paired t tests examined for differences in the helmet  
219 versus no helmet condition. This analysis was carried out separately for specialist and non-  
220 specialist physiotherapists.

221

222 The third hypothesis was that non-specialist physiotherapists would be more likely to report  
223 changes in confidence level in mobilising the patient as a result of helmet use than specialist  
224 neuroscience physiotherapists. In order to test this hypothesis, the specialist and non-  
225 specialist physiotherapists were divided by whether they had an increased level of confidence  
226 level with a helmet (expressed by a difference between self-described confidence level, or by  
227 a difference in the number of additional therapists they felt were needed). This was the  
228 dependent variable in an ordered logistic regression model. The independent variable was  
229 whether the physiotherapist was a specialist neurological physiotherapist, or whether they  
230 were a non-specialist physiotherapist. The number of years of experience was included as a  
231 covariate.

232

## 233 **Results**

### 234 **Table 1**

|                  | <b>Specialist neuroscience<br/>physiotherapists</b> | <b>Non specialist<br/>physiotherapists</b> |
|------------------|-----------------------------------------------------|--------------------------------------------|
| Number           | 44                                                  | 52                                         |
| Practice setting | 100% specialist                                     | 71.2% non neuroscience                     |

|                     | neurosciences centre | hospital setting                           |
|---------------------|----------------------|--------------------------------------------|
|                     |                      | 28.8 % community or rehabilitation setting |
| Years of experience |                      |                                            |
| 0-2                 | 15.9%                | 23.1%                                      |
| 2-5                 | 27.3%                | 40.4%                                      |
| 5-10                | 40.9%                | 23.1%                                      |
| >10                 | 15.9%                | 13.5%                                      |

235 Table 1: Participant characteristics of those who completed the survey.

236 Participant characteristics are described in Table 1. In order to be a physiotherapist in the UK,  
237 one must have a registration with the Health and Care Professions Council, for which a  
238 degree level physiotherapy qualification is required (usually 3 year undergraduate or a two  
239 year accelerated Masters). The proportions of the group with 0-2 years or at least 10 years of  
240 experience was similar. 27.3% of the specialist neurological physiotherapist group had 2-5  
241 years of experience whereas 40.4% of the non-specialist group had 2-5 years of experience.  
242 40.9% of the specialist neurological physiotherapist group had 5-10 years of practice,  
243 whereas 23.1% of the non-specialist group had 4-10 years of practice. Given the disparities in  
244 experience between the specialist and non-specialist groups, an experience variable has been  
245 included as a covariate in all the analyses undertaken.

246

247 When surveyed, specialist neurological physiotherapists report increased self-described  
248 confidence level mobilising stroke patients with decompressive hemicraniectomy than non-  
249 specialist physiotherapists in an experience-adjusted model (OR = 2.69, 95% CI 1.23-5.91 p  
250 value < 0.001). In contrast, there was no difference between the number of additional

251 therapists that specialist neurological physiotherapists and non-specialist physiotherapists  
252 would prefer in an experience-adjusted model (OR = 0.70, 95% CI 0.31-1.58, p value =  
253 0.15).

254

255 Non-specialist physiotherapists have increased self-described confidence level when  
256 mobilising stroke patients with decompressive hemicraniectomy if they are wearing helmets  
257 compared to no helmets (mean difference = 0.96, t value = 7.15, p value < 0.001). In  
258 addition, specialist neurological physiotherapists have increased self-described confidence  
259 level when mobilising stroke patients with decompressive hemicraniectomy if they are  
260 wearing helmets (mean difference = 0.68, t value = 3.51, p value < 0.001).

261

262 Non-specialist physiotherapists require fewer additional therapists when mobilising stroke  
263 patients with decompressive hemicraniectomy if they are wearing helmets (mean difference =  
264 -0.5, t value = 6.25, p value < 0.001). Specialist neurological physiotherapists require fewer  
265 additional therapists when mobilising stroke patients with decompressive hemicraniectomy if  
266 they are wearing helmets (mean difference = -0.41, t value = 5.45, p value < 0.001).

267

268 Examining the relationship between whether physiotherapist specialty and changing self-  
269 described confidence level depending on whether the patient was wearing a helmet, there was  
270 no significant association found (OR 0.86, 95% CI 0.38-1.97, p value = 0.72). Examining the  
271 relationship between whether physiotherapist specialty and changing the number of therapists  
272 required for assistance depending on whether the patient was wearing a helmet, there was no  
273 significant association found (OR 0.74, 95% CI 0.32-1.69, p value = 0.22). There was

274 therefore no evidence that specialist neurological physiotherapists were less likely to exhibit a  
275 confidence for patients wearing a helmet than non-specialist physiotherapists.

276

## 277 **Discussion**

278 Specialist physiotherapists were more comfortable mobilising stroke patients with  
279 decompressive hemicraniectomies; however, there was no evidence that they required a  
280 different number of additional therapists to aid with mobilisation. We also demonstrate that  
281 both specialist and nonspecialist physiotherapists would feel more comfortable and require  
282 fewer additional therapists to mobilise post-stroke patients with decompressive  
283 hemicraniectomy, were the patients to wear a helmet.

284

285 Our findings demonstrate that there is an association between increased physiotherapist  
286 confidence level mobilising patients and decompressive hemicraniectomy patients wearing  
287 helmets; however, there is no association between the additional the number of therapists  
288 required and wearing a helmet. This suggests that physiotherapist confidence level levels are  
289 intrinsic to patient state, rather than being associated with the amount of additional help  
290 available which is an important confounding factor. Relative staffing levels between hospitals  
291 cannot be implicated as a factor which might account for differences in therapy levels.

292 Looking further at association between self-described confidence level and the helmet  
293 condition, the experience covariate is a significant confound. This suggests that more  
294 experienced physiotherapists feel more comfortable when working with this patient cohort,  
295 which would be expected given the complex nature of these patients, as regards impediments  
296 to mobility and safety.

297

298 In addition, we demonstrate that while specialist neurological physiotherapists are more  
299 comfortable mobilising stroke patients with decompressive hemicraniectomies, both  
300 specialist neurological physiotherapists and non-specialist physiotherapists feel more  
301 comfortable mobilising patients, were the patient to wear a helmet, providing a strong  
302 argument for future research into this area. This finding is interesting as it indicates that  
303 regardless of training and experience of this specialist area, physiotherapist change their  
304 attitudes to patients when they wear a helmet, and they regard the helmet as protective even if  
305 they are not given any evidence in support of this. Specialist physiotherapists appear to have  
306 a different relative threshold for mobilising patients, rather than different beliefs regarding  
307 suitability of mobilisation in this patient cohort. A further analysis (to explore whether there  
308 is a difference between specialty and non-speciality physiotherapists in how likely they were  
309 to change opinions on confidence level mobilising a patient between the helmet and no  
310 helmet condition) did not reveal a difference between the two groups. While we have made  
311 no judgements about the level of risk from mobilising stroke patients after decompressive  
312 hemicraniectomy, it is interesting to note that physiotherapist attitudes to whether helmets  
313 may be useful in mitigating risk of mobilisation do not differ with subject matter expertise

314 The helmet itself may present certain limitations in potential cost and aesthetic: helmets must  
315 be sufficiently light so as not to burden the patient but strong and stable enough to protect  
316 from head injury.

317 Helmets have been studied widely in many contexts where they have been shown to prevent  
318 head injury. In a study looking at cycle related injuries in those with helmets in 1040 patients,  
319 114 of them wore helmets. Head injury was sustained by 4 people out of 114 (4%) as

320 opposed to the higher proportion of 100 people out of 900 (11%). Moreover, odds ratios  
321 showed a protective factor of 3.25 (1.17 to 9.06,  $p=0.024$ ) for wearing a helmet (21).

322 Helmets have been designed in the context of non-medical activities such as cycling but  
323 would likely need to be investigated and refined in the context of post-hemicraniectomy head  
324 injury. A study of 33 patients who had 14751 seizures in a one year period was conducted  
325 wherein they were provided with helmets. There were 59 injuries and helmets were only in  
326 use for 59% of accidents. In these situations, injuries continued to occur despite helmet use,  
327 particularly to the scalp and face (22). The study used ice hockey and hard foam (plastazote  
328 helmets), suggesting that a more refined approach specific to the nature of the potential injury  
329 is required. Indeed, many ice hockey helmets do not have facial protection and are often hard  
330 and heavy.

### 331 **Limitations**

332 First, the survey was advertised in the UK, and respondents are from the UK. There is inter-  
333 and intra-country variability in the use of helmets after decompressive hemicraniectomy (13)  
334 (14) (15). Different countries may use helmets post hemi-craniectomy to different extents.  
335 Physiotherapists in different countries may have different attitudes towards the use of  
336 helmets. Second, the reach of the survey is unquantified; however, it is likely that only a  
337 small fraction of those who received the invitation to complete the survey responded to this  
338 request. There is a possibility of a biased sample due to this response rate. Third, this study is  
339 based on a video of one subject. The patient featured in the video used for this paper likely  
340 has a modified Rankin scale of 4, and this is typical for a patient who has had a malignant  
341 MCA infarct and decompressive hemicraniectomy (16). In any cohort of patients with  
342 decompressive hemicraniectomy following malignant MCA infarct, there will be variability  
343 of patient deficit in the immediate post-operative period and in the long term, so analysis of



344 multiple patient videos representing differing levels of deficit would have improved the  
345 generalisability of this study.

346 Assessments using a Likert scale have limitations. An analysis of research into the Likert  
347 system showed that surveyed people tend to pick the central options more than extremes (i.e.  
348 very comfortable and very uncomfortable), termed the “anchor effect” (23). Furthermore,  
349 similarities between options such as “very comfortable” and “comfortable” may have had  
350 different meanings to different physiotherapists.

351

352

### 353 **Implications for practice**

354 The estimated cost of stroke to the UK economy is £9 billion annually (17). Even small  
355 changes in functional ability can increase the independence of stroke patients (18) (19). If  
356 physiotherapists feel that patients are more able to partake in physiotherapy as a result of  
357 using a helmet, this may result in functional improvements in these patients. Reduced  
358 physiotherapy input because of safety concerns may unnecessarily limit treatment.

359

### 360 **Future directions of research**

361 There has been insufficient study into the utility of helmets in decompressive  
362 hemicraniectomy patients. This is partly because adverse outcomes due to falls after  
363 hemicraniectomy are very rare. Some experts suggest use of a helmet in such circumstances  
364 (20), but this is not universal and practises vary between different centres and between  
365 different countries. Rather than seeking evidence for the efficacy of helmets in the setting of

366 post-operative malignant middle cerebral artery patient, we adopt a novel approach. We  
367 examine whether there are benefits of helmets with regards to aiding physiotherapist  
368 mobilisation, rather than considering their intrinsic benefit.

369

370 Future work should address the lack of systematic study into the adverse consequences of  
371 mobilisation in decompressive hemicraniectomy patients. Even for large centres of  
372 excellence, there may not be sufficient cases for a case series. One option would be to set up  
373 a registry for post-hemicraniectomy complications related to mobilisation. Interventional  
374 studies could be carried out to assess whether helmets did result in improved functional  
375 outcomes for this patient cohort. An unblinded study could be straightforward to arrange,  
376 especially if randomisation occurred at the hospital level. Qualitative studies, such as semi-  
377 structured interviews, would be useful to explore the determinants of physiotherapist attitudes  
378 to mobilisation of post-stroke hemicraniectomy patients. Given the differences in helmet use  
379 internationally, comparison of physiotherapist responses across different countries may be  
380 particularly useful.

381

## 382 **Conclusion**

383 Use of helmets increase physiotherapist confidence level immobilising stroke patients with  
384 decompressive hemicraniectomy. This is important because physiotherapy because the brain  
385 enters a heightened period of plasticity for a limited time post-stroke, and physiotherapy can  
386 be maximised during this period to improve patient outcomes.

387

## 388 **Appendix 1**

389 **Descriptor used in the survey**

390 “This survey is about patients with stroke who have had to undergo operations called  
391 decompressive hemicraniectomies. Large strokes can cause brain swelling. Brain swelling  
392 can cause death due to compression of the brainstem. Decompressive hemicraniectomy is a  
393 surgical technique used to relieve the increased pressure caused by the brain swelling and  
394 involves the removal of skull and an associated underlying layer of restrictive tissue covering  
395 the brain”

396

397

398 **References**

- 399 1. Hacke W, Schwab S, Horn M, Spranger M, De Georgia M, von Kummer R. “Malignant”  
400 middle cerebral artery territory infarction: clinical course and prognostic signs. Arch  
401 Neurol. 1996 Apr;53(4):309–15.
- 402 2. Yang M-H, Lin H-Y, Fu J, Roodrajeetsing G, Shi S-L, Xiao S-W. Decompressive  
403 hemicraniectomy in patients with malignant middle cerebral artery infarction: A  
404 systematic review and meta-analysis. Surg J R Coll Surg Edinb Irel. 2015  
405 Aug;13(4):230–40.
- 406 3. Zeiler SR, Hubbard R, Gibson EM, Zheng T, Ng K, O'Brien R, et al. Paradoxical Motor  
407 Recovery From a First Stroke After Induction of a Second Stroke: Reopening a  
408 Postischemic Sensitive Period. Neurorehabil Neural Repair. 2016 Sep;30(8):794–800.
- 409 4. Nahmani M, Turrigiano GG. Adult cortical plasticity following injury: Recapitulation of  
410 critical period mechanisms? Neuroscience. 2014 Dec 26;283:4–16.
- 411 5. AVERT Trial Collaboration group, Bernhardt J, Langhorne P, Lindley RI, Thrift AG,  
412 Ellery F, et al. Efficacy and safety of very early mobilisation within 24 h of stroke onset  
413 (AVERT): a randomised controlled trial. Lancet Lond Engl. 2015 Jul 4;386(9988):46–  
414 55.
- 415 6. Hensch TK. Critical period plasticity in local cortical circuits. Nat Rev Neurosci. 2005  
416 Nov;6(11):877–88.
- 417 7. Kurland DB, Khaladj-Ghom A, Stokum JA, Carusillo B, Karimy JK, Gerzanich V, et al.  
418 Complications Associated with Decompressive Craniectomy: A Systematic Review.  
419 Neurocrit Care. 2015 Oct;23(2):292–304.
- 420 8. Honeybul S. Decompressive craniectomy: A new complication. J Clin Neurosci. 2009  
421 May;16(5):727–9.

- 422 9. Mills NJ. Protective capability of bicycle helmets. *Br J Sports Med.* 1990 Mar;24(1):55–  
423 60.
- 424 10. Freitas CJ, Mathis JT, Scott N, Bigger RP, Mackiewicz J. Dynamic response due to  
425 behind helmet blunt trauma measured with a human head surrogate. *Int J Med Sci.*  
426 2014;11(5):409–25.
- 427 11. Scrivener K, Sherrington C, Schurr K. Exercise dose and mobility outcome in a  
428 comprehensive stroke unit: description and prediction from a prospective cohort study.  
429 *J Rehabil Med.* 2012 Oct;44(10):824–9.
- 430 12. Edwards MJ, Stone J, Nielsen G. Physiotherapists and patients with functional  
431 (psychogenic) motor symptoms: a survey of attitudes and interest. *J Neurol Neurosurg*  
432 *Psychiatry.* 2012 Jun;83(6):655–8.
- 433 13. Guhwe M, Blessing K, Chioffi S, Graffagnino C. Medical Management of a Stroke. In:  
434 Agrawal A, Britz G, editors. *Emergency Approaches to Neurosurgical Conditions*  
435 [Internet]. Springer International Publishing; 2015 [cited 2016 Jun 10]. p. 137–49.  
436 Available from: [http://link.springer.com/chapter/10.1007/978-3-319-10693-9\\_11](http://link.springer.com/chapter/10.1007/978-3-319-10693-9_11)
- 437 14. Ropper AE, Nalbach SV, Lin N, Dunn IF, Gormley WB. Resolution of extra-axial  
438 collections after decompressive craniectomy for ischemic stroke. *J Clin Neurosci.* 2012  
439 Feb;19(2):231–4.
- 440 15. Gerard C, Busl KM. Treatment of Acute Subdural Hematoma. *Curr Treat Options*  
441 *Neurol.* 2013 Dec 21;16(1):1–15.
- 442 16. Vahedi K, Hofmeijer J, Juettler E, Vicaut E, George B, Algra A, et al. Early  
443 decompressive surgery in malignant infarction of the middle cerebral artery: a pooled  
444 analysis of three randomised controlled trials. *Lancet Neurol.* 2007 Mar;6(3):215–22.
- 445 17. Saka Ö, McGuire A, Wolfe C. Cost of stroke in the United Kingdom. *Age Ageing.* 2009  
446 Jan 1;38(1):27–32.
- 447 18. Loewen SC, Anderson BA. Predictors of stroke outcome using objective measurement  
448 scales. *Stroke.* 1990 Jan;21(1):78–81.
- 449 19. Lohse KR, Lang CE, Boyd LA. Is More Better? Using Metadata to Explore Dose–  
450 Response Relationships in Stroke Rehabilitation. *Stroke.* 2014 Jul 1;45(7):2053–8.
- 451 20. Livesay S, Moser H. Evidence-based nursing review of craniectomy care. *Stroke J*  
452 *Cereb Circ.* 2014 Nov;45(11):e217-219.
- 453 21. Maimaris C, Summers CL, Browning C, Palmer CR. Injury patterns in cyclists attending  
454 an accident and emergency department: a comparison of helmet wearers and non-wearers.  
455 *BMJ (Clinical research ed).* 1994;308(6943):1537-40.  
456
- 457 22. Deekollu D, Besag FMC, Aylett SE. Seizure-related injuries in a group of young people  
458 with epilepsy wearing protective helmets: Incidence, types and circumstances. *Seizure -*  
459 *European Journal of Epilepsy.* 2005;14(5):347-53.  
460
- 461 23. Bishop PA, Herron RL. Use and Misuse of the Likert Item Responses and Other Ordinal  
462 Measures. *International journal of exercise science.* 2015;8(3):297-302.  
463  
464  
465

466

467 **Acknowledgements**

468 None.

469 **Declaration of Interests**

470 The authors have no conflicts of interest to declare. There was no grant support for this

471 research.

472 **Funding**

473 This research received no specific grant from any funding agency in the public, commercial,

474 or not-for-profit sectors. NS is supported by the National Institute for Health Research

475 University College London Hospitals Biomedical Research Centre.

476

477 **Word count**

478 Word count: 2943

479 Number of tables and figures: 1

480 **Acknowledgements**

481 None

482

483
